# Supplementary material for: Psychological Interventions for Post-traumatic Stress Symptoms in Psychosis: A Systematic Review of Outcomes
Source: PubMed Central journal article supplement (PMC5348513; doi:10.3389/fpsyg.2017.00341), 2017-03-14
Supplement: Table1.pdf [file Table1.pdf]

## *Supplementary Material*

# **Psychological interventions for post-traumatic stress symptoms in psychosis: A systematic review of outcomes**

Sarah Swan<sup>1\*</sup>, Nadine Keen<sup>1,2</sup>, Nicola Reynolds<sup>1,2</sup>, Juliana Onwumere<sup>1,2</sup>

<sup>1</sup> South London and Maudsley NHS Foundation Trust, London, United Kingdom

<sup>2</sup> Department of Psychology, Institute of Psychiatry, Psychology and Neuroscience, King's College London, United Kingdom

### **\*Correspondence**

Dr Sarah Swan

Sarah.Swan@slam.nhs.uk

## **1 Supplementary Tables**

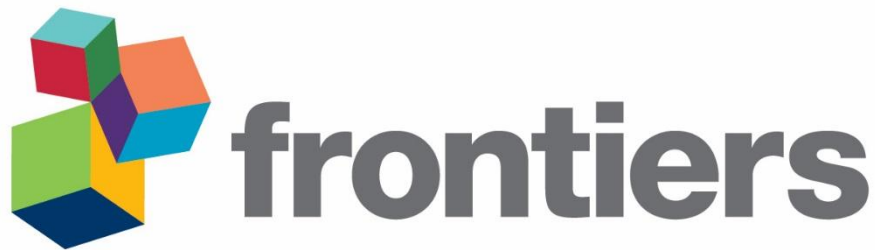

**1.1 Supplementary Table 1. Characteristics of studies investigating psychological interventions for PTS symptoms in the context of a primary diagnosis of psychosis**

| Authors (Date)                                | Country | Design              | Sample Size N (Psychosis %) | Setting & Format                    | Intervention | No. of sessions | Outcome measures            | Key results                                                                                                                                                                                                                                                                                                                 |
|-----------------------------------------------|---------|---------------------|-----------------------------|-------------------------------------|--------------|-----------------|-----------------------------|-----------------------------------------------------------------------------------------------------------------------------------------------------------------------------------------------------------------------------------------------------------------------------------------------------------------------------|
| Callcott, Standart & Turkington (2004)        | UK      | Case series         | 2 (100%)                    | Community<br>Individual             | CBT          | 12 to 17        | IES, BDI, CPRS, SANS        | Reduction in PTS symptoms in both cases, including intrusions; one case showed reduced avoidance strategies and depressive symptoms; other case improved on general psychopathology and negative symptoms of psychosis.                                                                                                     |
| Hamblen, Jankowski, Rosenberg & Mueser (2004) | USA     | Case series         | 3 (66.6%)                   | Community<br>Individual             | CBT          | 12 to 16        | CAPS, BPRS                  | <p>Following intervention, two cases no longer meeting criteria for PTSD; reductions in general psychopathology.</p> <p>At 3 month follow-up, end of therapy gains were maintained.</p> <p>One case still meeting criteria for PTSD showed clinically meaningful reduction in PTS symptoms and general psychopathology.</p> |
| Rosenberg et al (2004)                        | USA     | Un-controlled study | 22 (45%)                    | Community & inpatient<br>Individual | CBT          | 12 to 16        | CAPS, BPRS, Safety measures | <p>Statistically and clinically significant reduction in PTS symptoms following intervention</p> <p>At 3 month follow-up, reduction in PTS symptoms maintained; significantly fewer participants meeting criteria for PTSD compared to baseline; significant reduction in affect symptoms.</p>                              |

|                                 |     |                     |           |                      |                                                       |    |                                |                                                                                                                                                                                                                                                                                                                                                                                                                                           |
|---------------------------------|-----|---------------------|-----------|----------------------|-------------------------------------------------------|----|--------------------------------|-------------------------------------------------------------------------------------------------------------------------------------------------------------------------------------------------------------------------------------------------------------------------------------------------------------------------------------------------------------------------------------------------------------------------------------------|
| Bernard, Jackson & Jones (2006) | UK  | RCT                 | 23 (100%) | Community Individual | Written Disclosure vs Writing of non-emotional topics | 3  | IES-R, RSQ, IS, HADS, PANAS    | <p>Significant reduction in severity of PTS symptoms for treatment group compared to control.</p> <p>There was a main effect for avoidance, with reduced avoidance symptoms seen at follow-up compared to baseline, when comparing treatment with control.</p>                                                                                                                                                                            |
| Kevan, Gumley & Coletta (2007)  | UK  | Case study          | 1 (100%)  | Community Individual | CBT                                                   | 9  | PDS, PTCL, BDI-II,             | <p>No longer meeting diagnostic criteria for PTSD following treatment; reduction in negative cognitions and self-blame; clinically significant reduction in depression (severe to minimal range); general effect of treatment in reducing subjective ratings of problematic beliefs.</p> <p>Gains maintained at 1 month follow-up.</p>                                                                                                    |
| Mueser et al (2007)             | USA | Un-controlled study | 80 (21%)  | Community Group      | CBT                                                   | 21 | THQ, PCL, K-PTSD, PTCL, BDI-II | <p>Significant reduction in PTS symptoms and number of participants meeting diagnostic criteria; significant reduction in trauma related cognitions; knowledge about PTSD significantly increased; significant reduction in depression; treatment completers had fewer PTS symptoms and depression at the end of the treatment compared to non-completers.</p> <p>At 3 month follow-up, gains maintained expect knowledge about PTSD.</p> |

|                            |     |                                 |             |                                                        |                                     |          |                                                           |                                                                                                                                                                                                                                                                                                                                                                                                                                                  |
|----------------------------|-----|---------------------------------|-------------|--------------------------------------------------------|-------------------------------------|----------|-----------------------------------------------------------|--------------------------------------------------------------------------------------------------------------------------------------------------------------------------------------------------------------------------------------------------------------------------------------------------------------------------------------------------------------------------------------------------------------------------------------------------|
| Trappler & Newville (2007) | USA | Non randomised controlled study | 48 (100%)   | Inpatient Group                                        | CBT vs Supportive counselling group | 12       | IES, BPRS                                                 | Significant reduction in PTS symptoms, specifically regarding intrusions and avoidance, for the CBT group compared to supportive counselling; Significant decrease in positive symptoms, emotional withdrawal, tension, depression, unusual thought content, blunted affect, excitement, disorientation and elevated mood for CBT group.                                                                                                         |
| Mueser et al (2008)        | USA | RCT                             | 108 (15.7%) | Community Individual                                   | CBT vs TAU                          | 12 to 16 | CAPS, PTCI, K-PTSD, BPRS, BAI, BDI-II, SF-12, WAI         | CBT significantly better in reducing PTS symptoms; no difference between CBT and TAU in eliminating PTSD diagnosis however; larger effect size seen for more severe PTS symptoms compared to mild-moderate symptom severity; CBT was more effective in reducing negative trauma-related cognitions, depression, anxiety, health related concerns and improving knowledge of PTSD.<br><br>At 3 and 6 month follow-up, gains continued to improve. |
| Frueh et al (2009)         | USA | Un-controlled study             | 20 (100%)   | Community Mixed: Group followed by individual sessions | CBT                                 | 22       | CAPS, PCL, HAM-A, CGI, NAI, MOS SF-36, CPOSS, Functioning | Significant reduction in PTS symptoms at end of treatment; significant improvement in symptoms of anger, satisfaction, quality of social relationships.<br><br>At 3 month follow-up, PTS symptoms significantly improved (>75% treatment responders); anger and satisfaction significantly improved compared to baseline; fewer primary care visits endorsed compared to baseline.                                                               |

|                                    |             |                     |              |                         |                     |          |                                                                                           |                                                                                                                                                                                                                                                                                                                                                                                                                            |
|------------------------------------|-------------|---------------------|--------------|-------------------------|---------------------|----------|-------------------------------------------------------------------------------------------|----------------------------------------------------------------------------------------------------------------------------------------------------------------------------------------------------------------------------------------------------------------------------------------------------------------------------------------------------------------------------------------------------------------------------|
| Jackson et al (2009)               | UK          | RCT                 | 66<br>(100%) | Community<br>Individual | CBT (CRI)<br>vs TAU | up to 26 | IES-R,<br>CDSS,<br>SCQ                                                                    | <p>Borderline significant difference between CRI and TAU for PTS symptoms; higher baseline severity of PTS symptoms and shorter duration of untreated psychosis tended to benefit the most from CRI; no difference between groups for symptoms of depression or self esteem.</p> <p>At 12 months follow-up, significantly more participants in the CRI group made clinically significant improvements compared to TAU.</p> |
| Lu et al (2009)                    | USA         | Un-controlled study | 19<br>(16%)  | Community<br>Individual | CBT                 | 12-16wks | PDS,<br>PCL,<br>BPRS,<br>BDI-II                                                           | <p>Over 75% of participants had a significant improvement in PTS symptoms; significantly fewer participants meeting criteria post-treatment.</p> <p>Significantly fewer participants meeting PTSD criteria compared to baseline at 3 and 6 month follow-up; 92% and 100% of participants showed significant reduction in PTS symptoms compared to baseline at 3 and 6 month follow-up respectively.</p>                    |
| Van den Berg & Van der Gaag (2012) | Netherlands | Un-controlled study | 27<br>(100%) | Community<br>Individual | EMDR                | 6        | CAPS,<br>PSS-SR,<br>PSYRATS<br>(AHR &<br>DRS),<br>GPTS,<br>BDI-II,<br>BAI,BHS,<br>SERS-SF | <p>Significant reduction in PTS symptoms (large effect size); small but significant reduction in psychotic symptoms in treatment completers; depression, anxiety and self esteem significantly improved.</p>                                                                                                                                                                                                               |

|                                       |             |            |                |                         |                                         |    |                                                                                           |                                                                                                                                                                                                                                                                                                                                                                                                        |
|---------------------------------------|-------------|------------|----------------|-------------------------|-----------------------------------------|----|-------------------------------------------------------------------------------------------|--------------------------------------------------------------------------------------------------------------------------------------------------------------------------------------------------------------------------------------------------------------------------------------------------------------------------------------------------------------------------------------------------------|
| De Bont, Van Minnen & De Jongh (2013) | Netherlands | RCT        | 10<br>(100%)   | Community<br>Individual | PE vs<br>EMDR                           | 12 | CAPS,<br>PSS-SR,<br>PSYRATS<br>(AHRs),<br>O-LIFE,<br>OQ-45,<br>SFS,<br>safety<br>measures | <p>PTS symptom severity significantly reduced; 75% of completers no longer met criteria for PTSD; significant reduction in general psychopathology; no significant effect on psychotic symptoms however significant decline in psychosis-prone thinking. Outcome was comparable between PE and EMDR with no significant difference.</p> <p>At 3 month follow-up, gains in PTS symptoms maintained.</p> |
| Kayrouz & Vrkleviski (2015)           | Australia   | Case study | 1<br>(100%)    | Inpatient<br>Individual | CBT                                     | 19 | IES-R,<br>DASS,TA<br>BS,<br>qualitative<br>measure of<br>psychosis                        | <p>At post intervention a 70% reduction in PTS symptom report; no longer in clinical range for mood/anxiety symptoms; increase in social engagement.</p> <p>Elevation in paranoia during treatment which recovered post-treatment.</p>                                                                                                                                                                 |
| Van den Berg et al (2015)             | Netherlands | RCT        | 155<br>(93.6%) | Community<br>Individual | PE,<br>EMDR vs<br>Waiting List<br>(TAU) | 8  | CAPS,<br>PSS-SR,<br>PTCI                                                                  | <p>PE and EMDR reduced PTS symptoms/cognitions and were more likely to achieve and maintain loss of PTSD diagnosis compared to TAU; there was no significant difference in outcome when comparing PE and EMDR.</p> <p>At 6 month follow-up, outcome was maintained for both PE and EMDR</p>                                                                                                            |

*BAI = Beck anxiety inventory; BDI=Beck depression inventory; BHS=Beck hopelessness scale; BPRS=Brief psychiatric rating scale; CAPS=Clinician administered PTSD scale; CGI=Clinical global impressions scale; CPOSS=Charleston psychiatric outpatient satisfaction scale; CPRS=Comprehensive psychopathological rating scale; CDSS=Calgary depression scale; DASS=Depression anxiety stress scale; GPTS=Green et al paranoid thought scale; HADS=Hospital anxiety and depression scale; HAM-A= Hamilton rating scale for depression; IES/IES-R=Impact of events scale/revised; IS=Insight scale; K-PTSD=Knowledge of PTSD test; MOS-SF36/SF-12=Medical outcome study short form health survey; NAI=Novaco anger inventory; O-LIFE=Oxford liverpool inventory of feelings and experiences; OQ-45=Outcome questionnaire; PANAS=Positive and negative affect schedule; PCL=PTSD checklist, PSS-SR=PTSD symptom scale self report; PSYRATS=Psychotic symptom rating scale (AHRS=auditory hallucination rating subscale, DRS=Delusion rating subscale); PTCI=Post-traumatic cognitions inventory; RSQ=Recovery style questionnaire; SANS=Scale for assessment of negative symptoms; SCQ=Self esteem questionnaire; SERS-SF=Self esteem rating scale short form; SFS=Social functioning scale; TABS=Trauma and attachment beliefs scale; THQ=Trauma history questionnaire; WAI=Working alliance inventory*
